# Supplementary material
Source: ML conference proceedings conference paper supplement (https://openaccess.thecvf.com/content/CVPR2022/html/Hu_Adversarial_Texture_for_CVPR_2022_paper.html)
Supplement: Supplementary file 1 [file Hu_Adversarial_Texture_for_CVPR_2022_supplemental.zip]

Archive with 4 entries (4 files):
- Supplementary_video.mp4
- __MACOSX/._Supplementary_video.mp4
- 03468-supp.pdf
- __MACOSX/._03468-supp.pdf
